# Supplementary material for: Ultrathin nanowire PdX2 (X = P, As): stability, electronic transport and thermoelectric properties
Source: Royal Society of Chemistry journal article supplement (doi:10.1039/d0nj03604h), 2020-01-01
Supplement: d0nj03604h1.pdf [file d0nj03604h1.pdf]

## **SUPPLEMENTARY MATERIAL**

### **Ultrathin nanowire PdX<sub>2</sub> (X= P, As): stability, electronic transport and thermoelectric properties**

Prabal Dev Bhuyan<sup>1, 2</sup>, Yogesh Sonvane<sup>3</sup>, P. N. Gajjar<sup>2</sup>, Rajeev Ahuja<sup>4</sup> and Sanjeev K. Gupta<sup>1,\*</sup>

<sup>1</sup>Computational Materials and Nanoscience Group, Department of Physics and Electronics,  
St. Xavier's College, Ahmedabad 380009, India

<sup>2</sup>Department of Physics, Gujarat University, Ahmedabad 380009, India

<sup>3</sup>Department of Applied Physics, S.V. National Institute of Technology, Surat 395007, India

<sup>4</sup>Ångströmlaboratoriet, Department of Physics and Astronomy, Uppsala University,  
Lägerhyddsvägen 1, Box 516, 751 20 Uppsala, Sweden

*(August 05, 2020)*

**Keyword(s):** Nanowires, Energy harvesting, Density functional theory, Band structure, Transport

**\*Corresponding author:** Dr Sanjeev K. Gupta (E-mail: [sanjeev.gupta@sxca.edu.in](mailto:sanjeev.gupta@sxca.edu.in))  
Prof. P. N. Gajjar (E-mail: [pngajjar@gujaratuniversity.ac.in](mailto:pngajjar@gujaratuniversity.ac.in))

**Table S1:** Our calculated lattice constant, bond length and cohesive energy of PdP<sub>2</sub> and PdAs<sub>2</sub> monolayer. Previous reported results are also listed in brackets from ref <sup>1</sup>.

| Material          | Lattice constant (Å) | Pd-X (Å)       | X-X (Å)        | E <sub>coh</sub> (eV per atom) |
|-------------------|----------------------|----------------|----------------|--------------------------------|
| PdP <sub>2</sub>  | 5.99<br>(5.86)       | 2.38<br>(2.32) | 2.08<br>(2.06) | 4.01 (3.67)                    |
| PdAs <sub>2</sub> | 6.29<br>(6.19)       | 2.47<br>(2.42) | 2.31<br>(2.31) | 3.56 (3.18)                    |

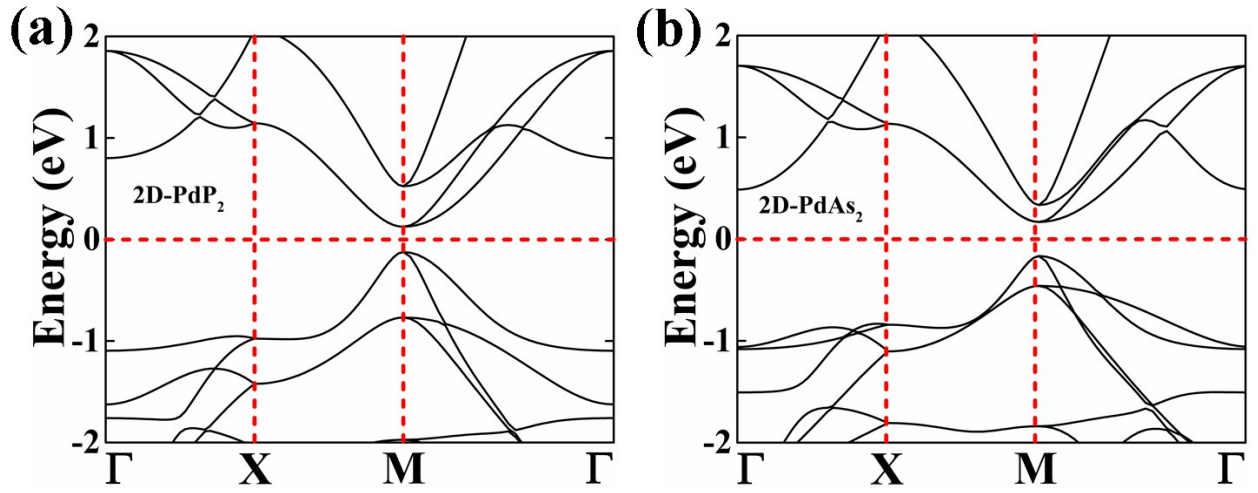

**Figure S1:** The electronic band structure of penta PdP<sub>2</sub> and PdAs<sub>2</sub> monolayer. The Fermi level is set at 0K.

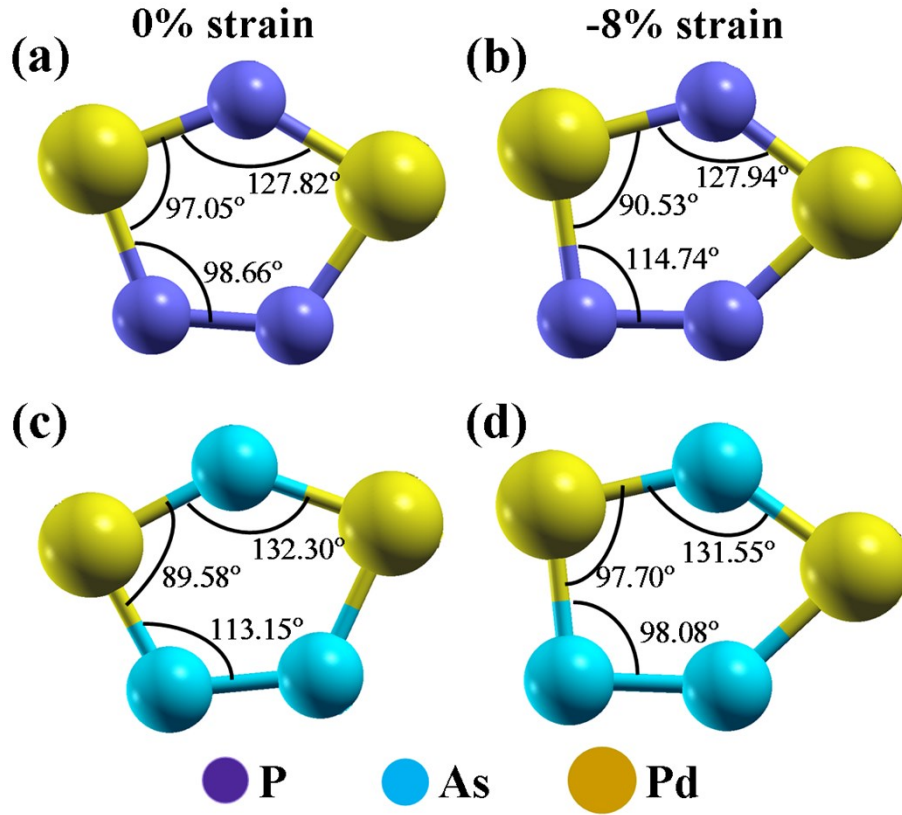

**Figure S2:** The electronic structure of pentagonal  $\text{PdP}_2$  and  $\text{PdAs}_2$  at 0% and 8% compressive strain.

**Table S2:** Variation of bond length and bond angle at different applied strain

| Strain                  |             | Bond Length (Å) |      |      | Bond Angle (°) (X-Pd-X) |
|-------------------------|-------------|-----------------|------|------|-------------------------|
|                         |             | Pd-Pd           | Pd-X | X-X  |                         |
| <b>PdP<sub>2</sub></b>  | <b>0%</b>   | 4.23            | 2.40 | 2.02 | 180                     |
|                         | <b>-2%</b>  | 4.22            | 2.39 | 2.02 | 180                     |
|                         | <b>-4%</b>  | 4.20            | 2.39 | 2.02 | 180                     |
|                         | <b>-6%</b>  | 4.19            | 2.39 | 2.02 | 180                     |
|                         | <b>-8%</b>  | 4.16            | 2.39 | 2.02 | 180                     |
|                         | <b>-10%</b> | 4.15            | 2.38 | 2.02 | 180                     |
|                         | <b>-12%</b> | 2.83            | 2.50 | 2.03 | 144.9                   |
|                         | <b>-14%</b> | 3.09            | 2.45 | 2.00 | 101.2                   |
| <b>PdAs<sub>2</sub></b> | <b>0%</b>   | 4.29            | 2.49 | 2.25 | 180                     |
|                         | <b>-2%</b>  | 4.28            | 2.48 | 2.25 | 180                     |

|      |      |      |      |     |
|------|------|------|------|-----|
| -4%  | 4.27 | 2.48 | 2.24 | 180 |
| -6%  | 4.28 | 2.48 | 2.24 | 180 |
| -8%  | 4.41 | 2.49 | 2.24 | 180 |
| -10% | 4.40 | 2.49 | 2.25 | 180 |
| -12% | 4.40 | 2.50 | 2.25 | 180 |
| -14% | 4.41 | 2.50 | 2.26 | 180 |

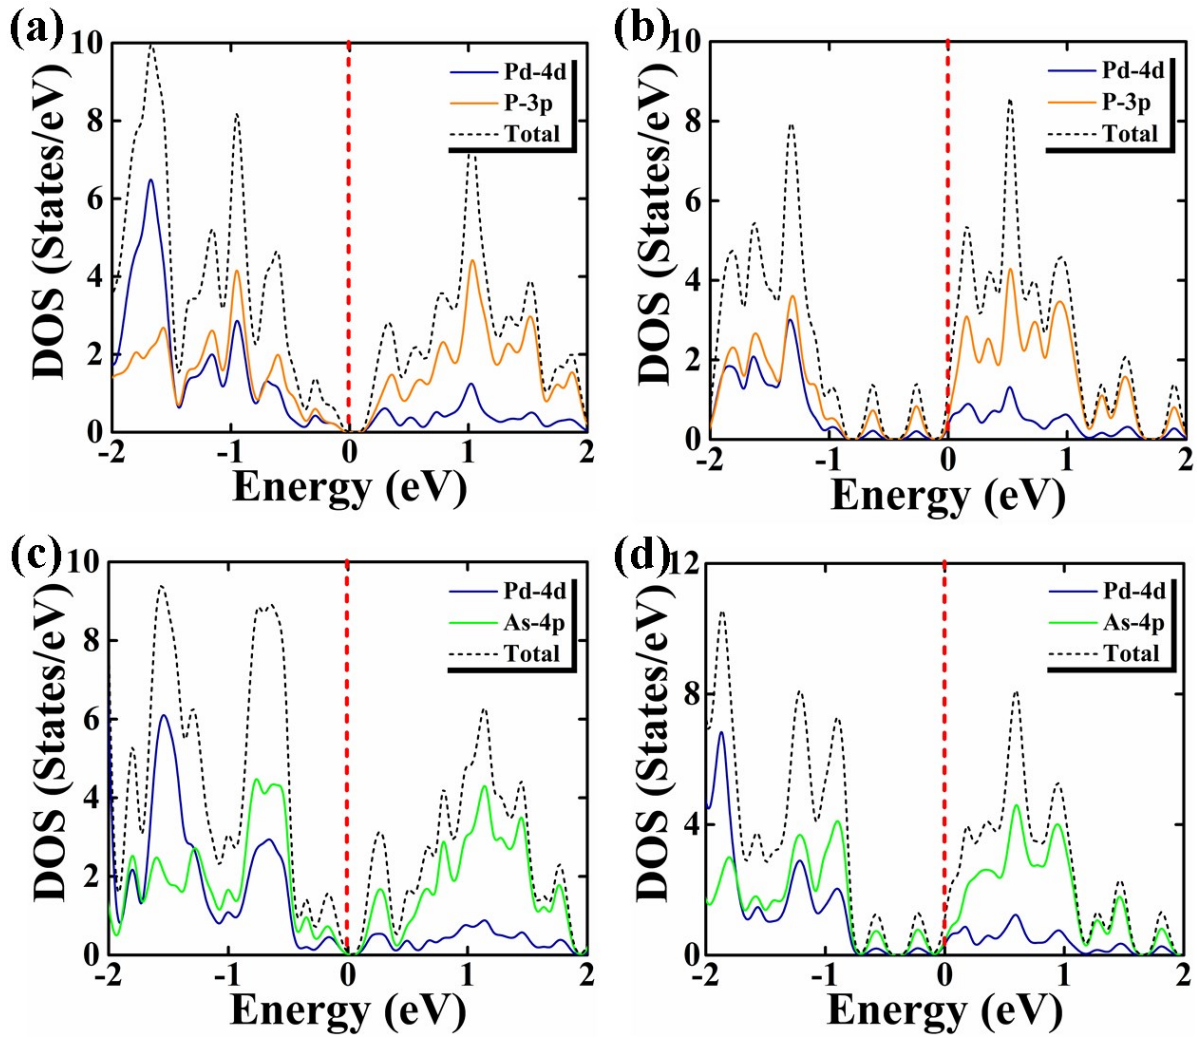

**Figure S3:** The calculated total density of states (TDOS) and partial density of states (PDOS) graph of unstrained ( $\epsilon=0\%$ ) (a)  $\text{PdP}_2\text{-NW}$  and (c)  $\text{PdAs}_2\text{-NW}$  is shown. Correspondingly, strained ( $\epsilon=-8\%$ ) PDOS of (b)  $\text{PdP}_2$  and (d)  $\text{PdAs}_2$  is also shown.

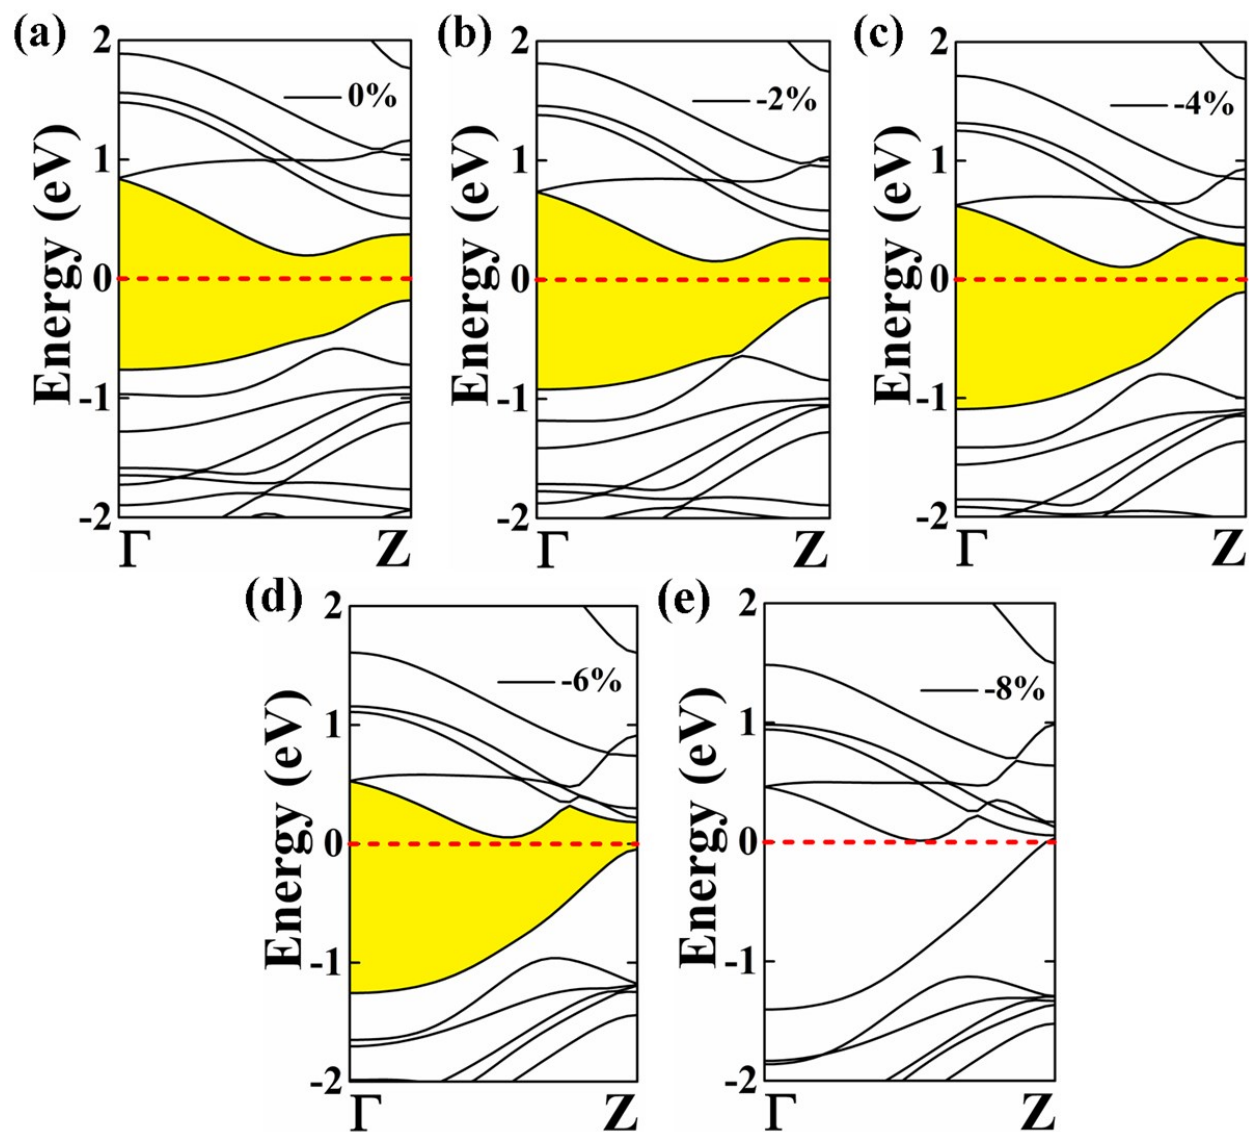

**Figure S4:** The electronic band structure of penta PdP<sub>2</sub>-NW with applied strain. The Fermi level is set at 0K.

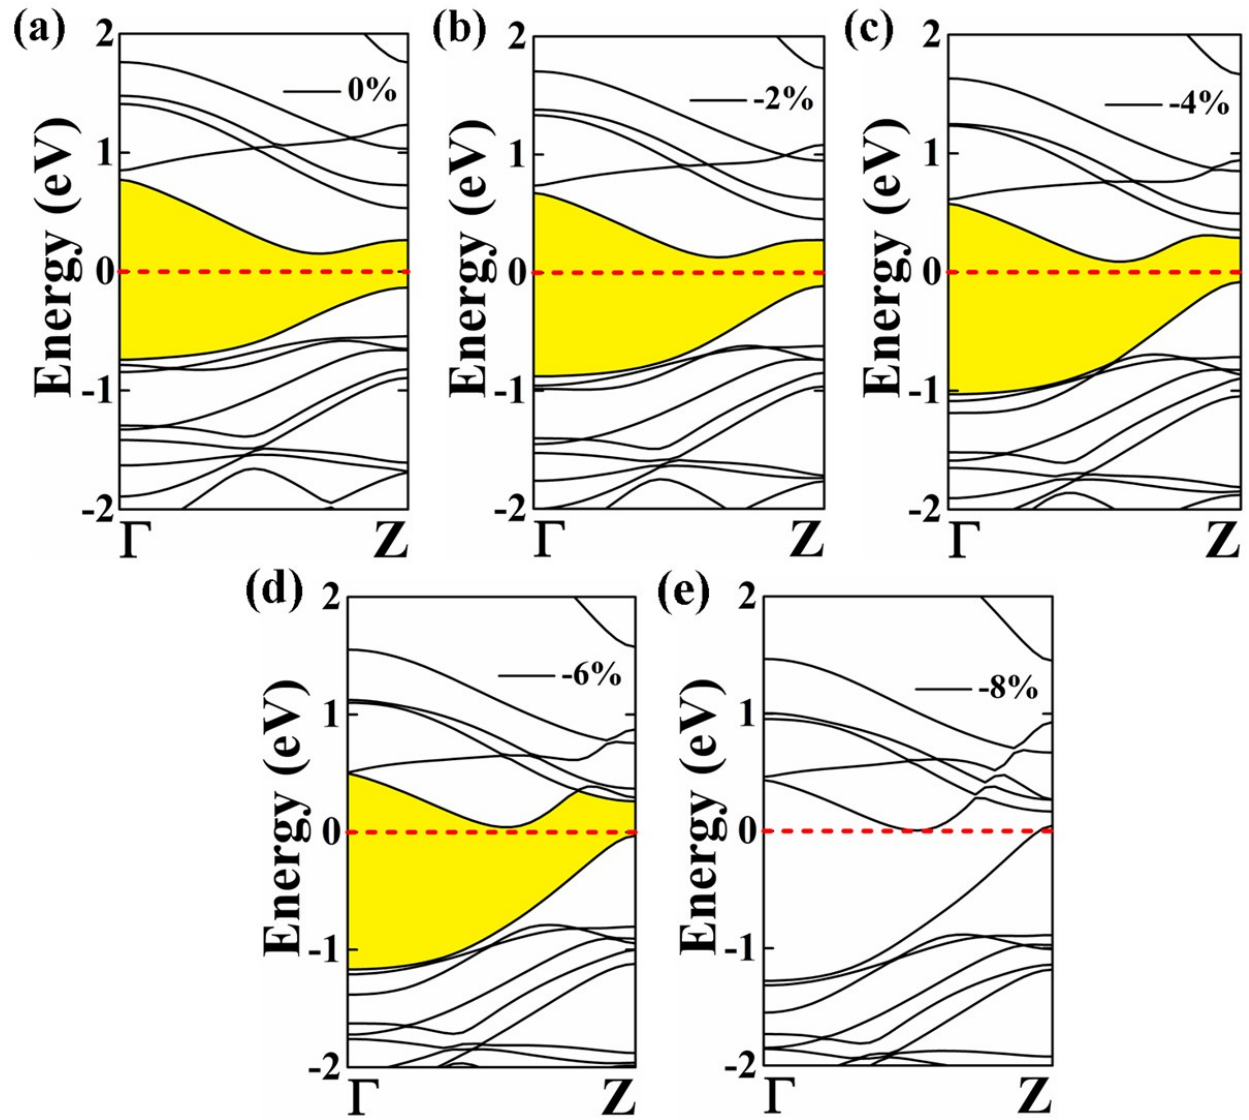

**Figure S5:** The electronic band structure of penta PdAs<sub>2</sub>-NW with applied strain. The Fermi level is set at 0K.

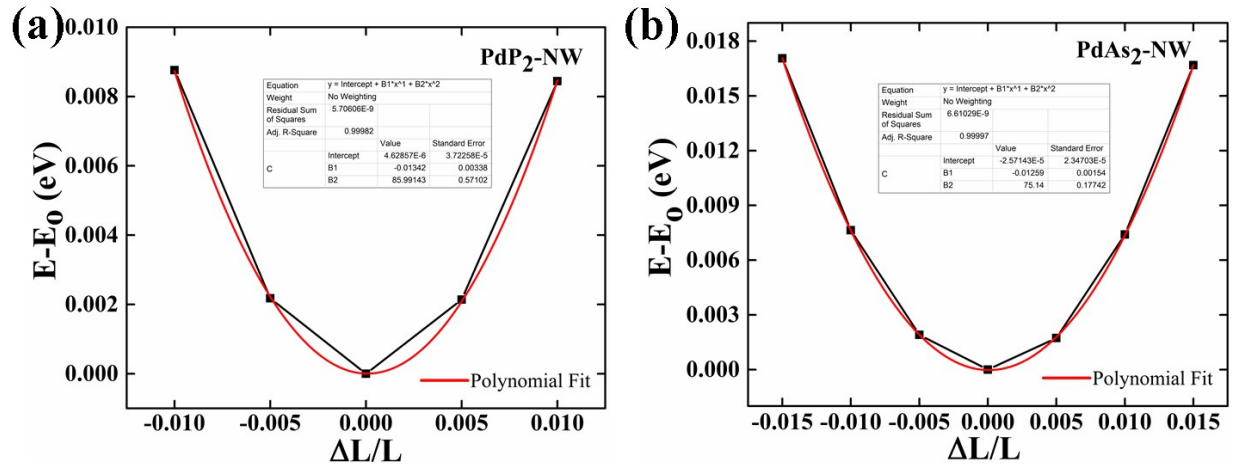

**Figure S6:** The graph for stiffness constant of (a) PdP<sub>2</sub>-NW and (b) PdAs<sub>2</sub>-NW

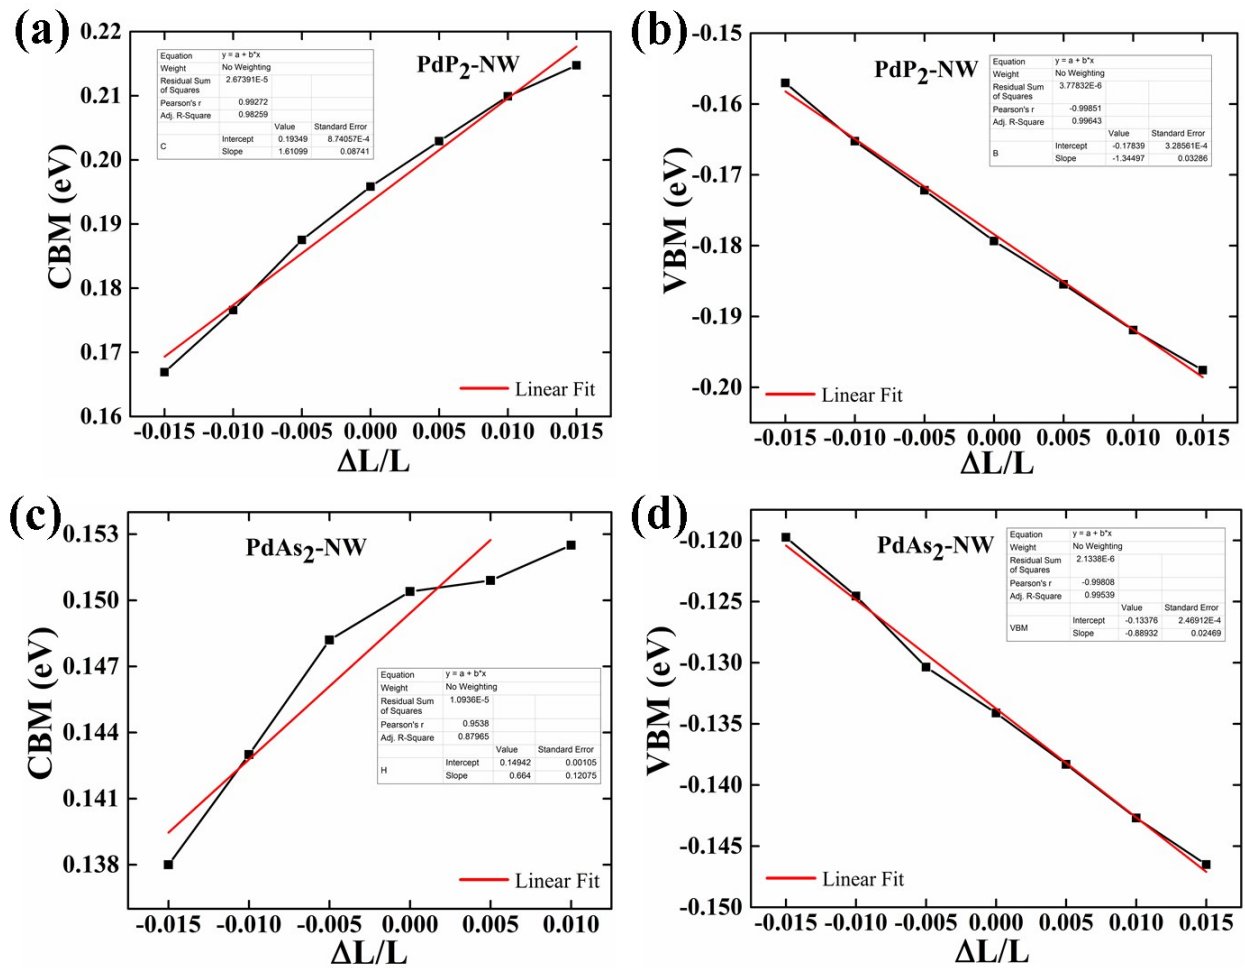

**Figure S7:** The graph for deformation potential of (a) electrons and (b) holes of PdP<sub>2</sub>-NW and (c) electrons and (d) holes of PdAs<sub>2</sub>-NW

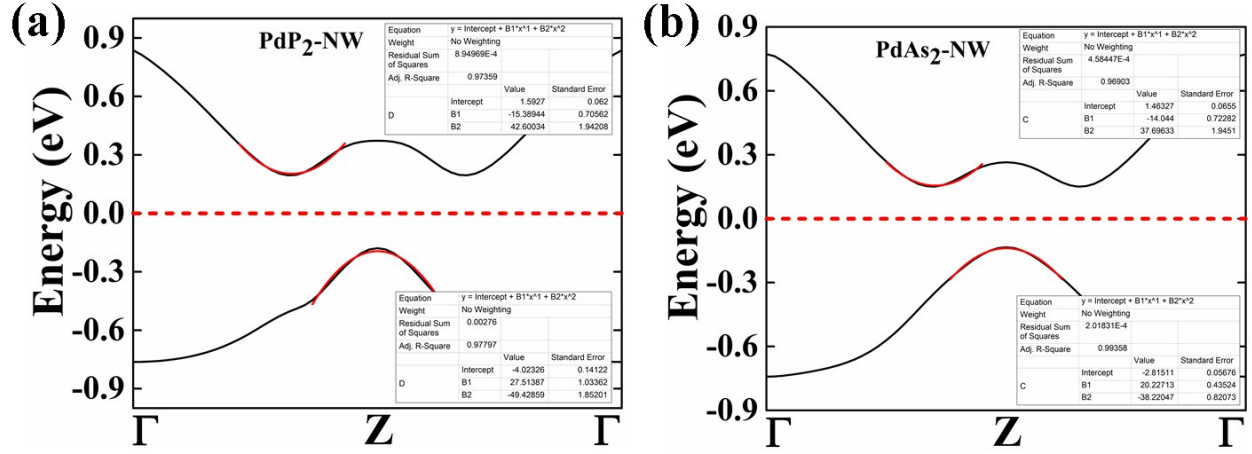

**Figure S8:** The graph for effective mass calculation of (a) PdP<sub>2</sub>-NW and (b) PdAs<sub>2</sub>-NW

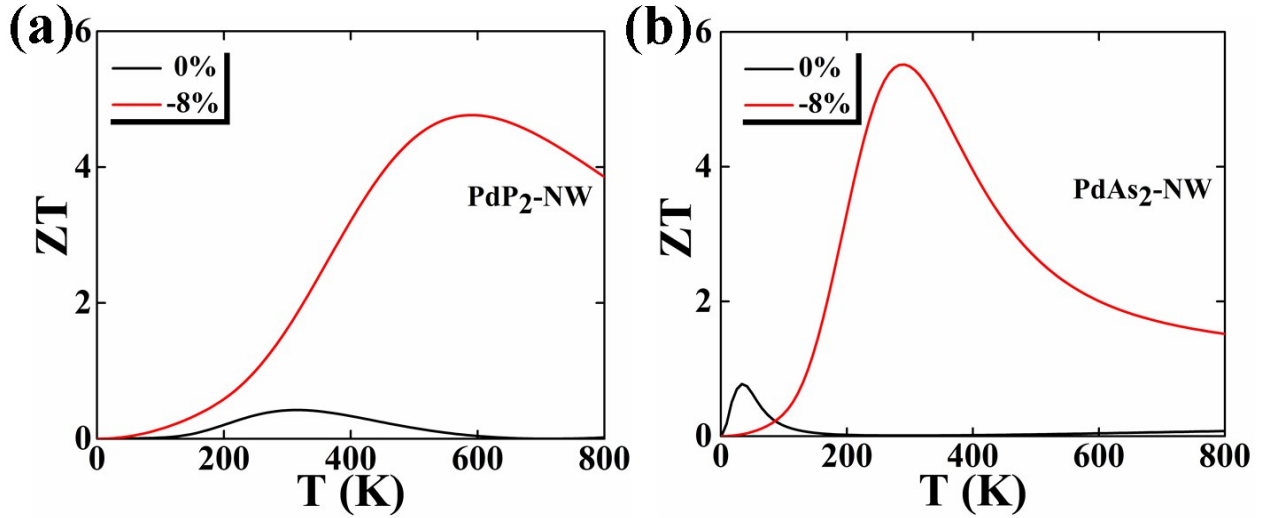

**Figure S9:** Calculated figure of merit (ZT) of both strained and unstrained ( $\epsilon = 0\%$  and  $-8\%$ ) for (a) PdP<sub>2</sub>-NW and (b) PdAs<sub>2</sub>-NW as a function of temperature is shown for larger lead. Both lead and scattering region are of the same material. The left and right lead consists of three primitive unit cells. The scattering region is consisting of three primitive cells.

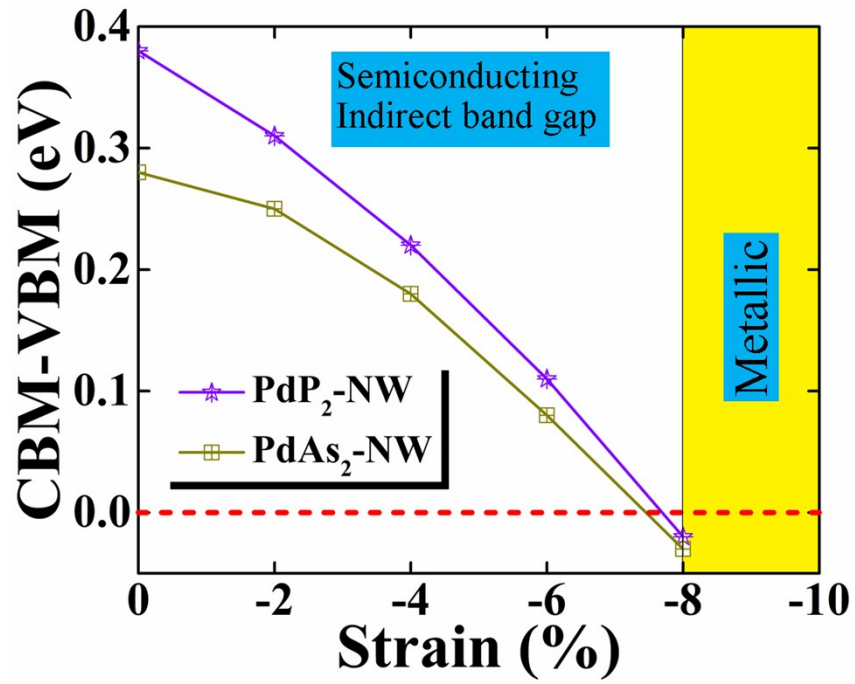

**Figure S10:** The variation of band gap with applied compressive strain for penta PdP<sub>2</sub> and PdAs<sub>2</sub>-NW.

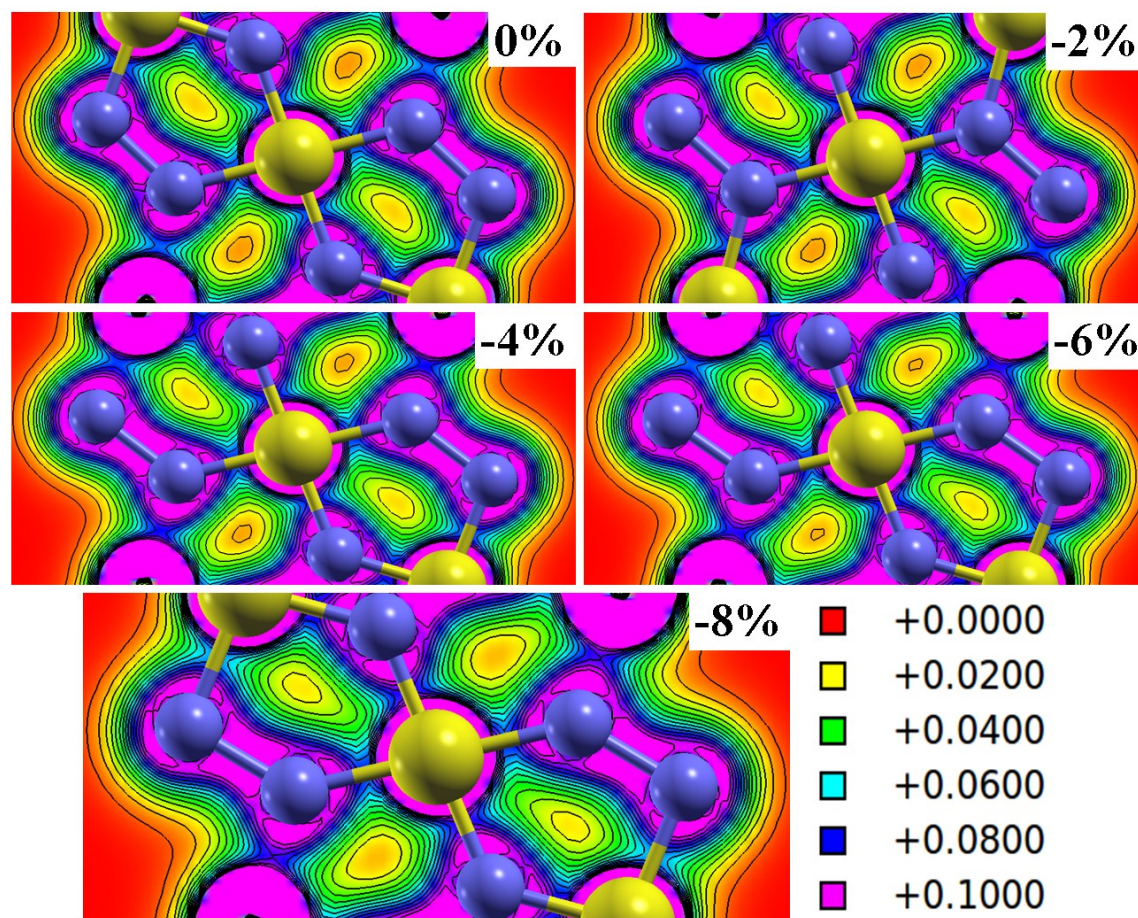

**Figure S11:** The charge contour plot of PdP<sub>2</sub>-NW with applied strain.

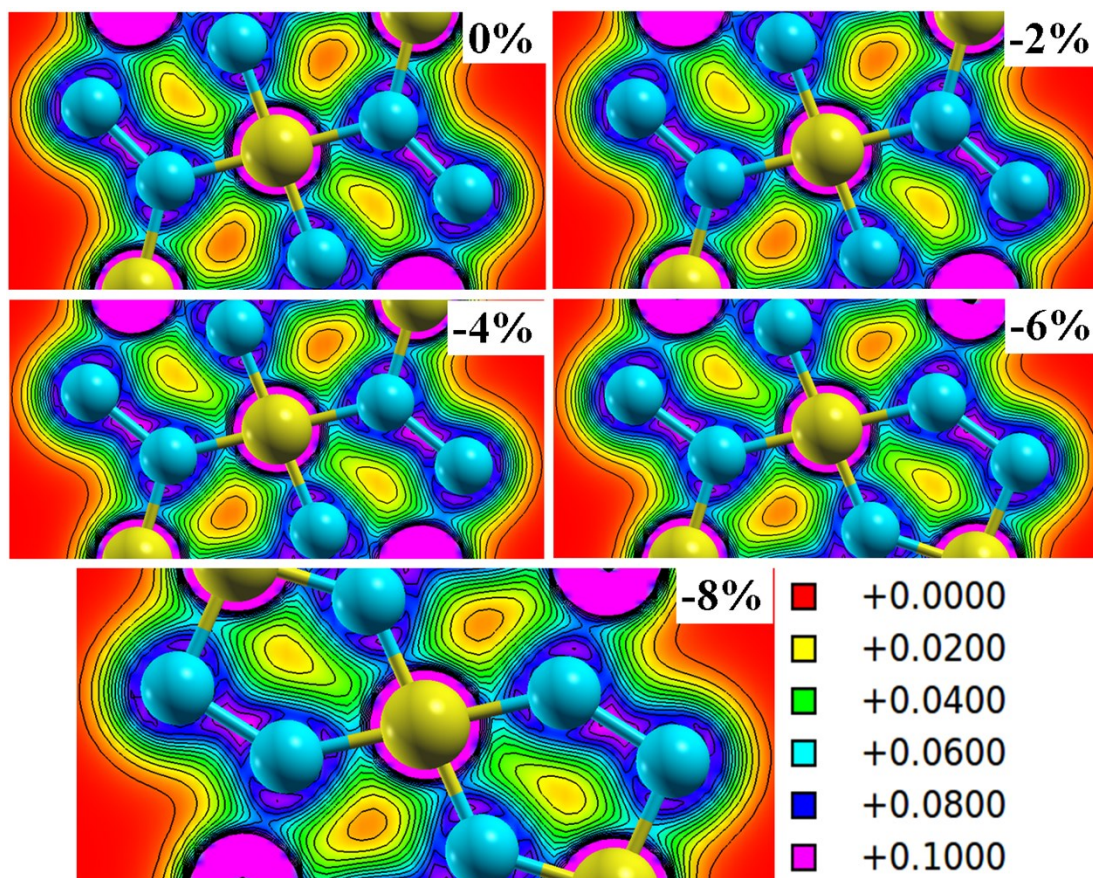

**Figure S12:** The charge contour plot of PdAs<sub>2</sub>-NW with applied strain.

#### References:

- (1) Yuan, H.; Li, Z.; Yang, J. Atomically Thin Semiconducting Penta-PdP<sub>2</sub> and PdAs<sub>2</sub> with Ultrahigh Carrier Mobility. *J. Mater. Chem. C* **2018**, *6* (34), 9055–9059. <https://doi.org/10.1039/C8TC03368D>.
